# Supplementary material for: Mesenchymal Stem Cells: A New Choice for Nonsurgical Treatment of OA? Results from a Bayesian Network Meta-Analysis
Source: PubMed Central journal article supplement (PMC7876826; doi:10.1155/2021/6663003), 2021-02-02
Supplement: 6663003.f1.pdf [file 6663003.f1.pdf]

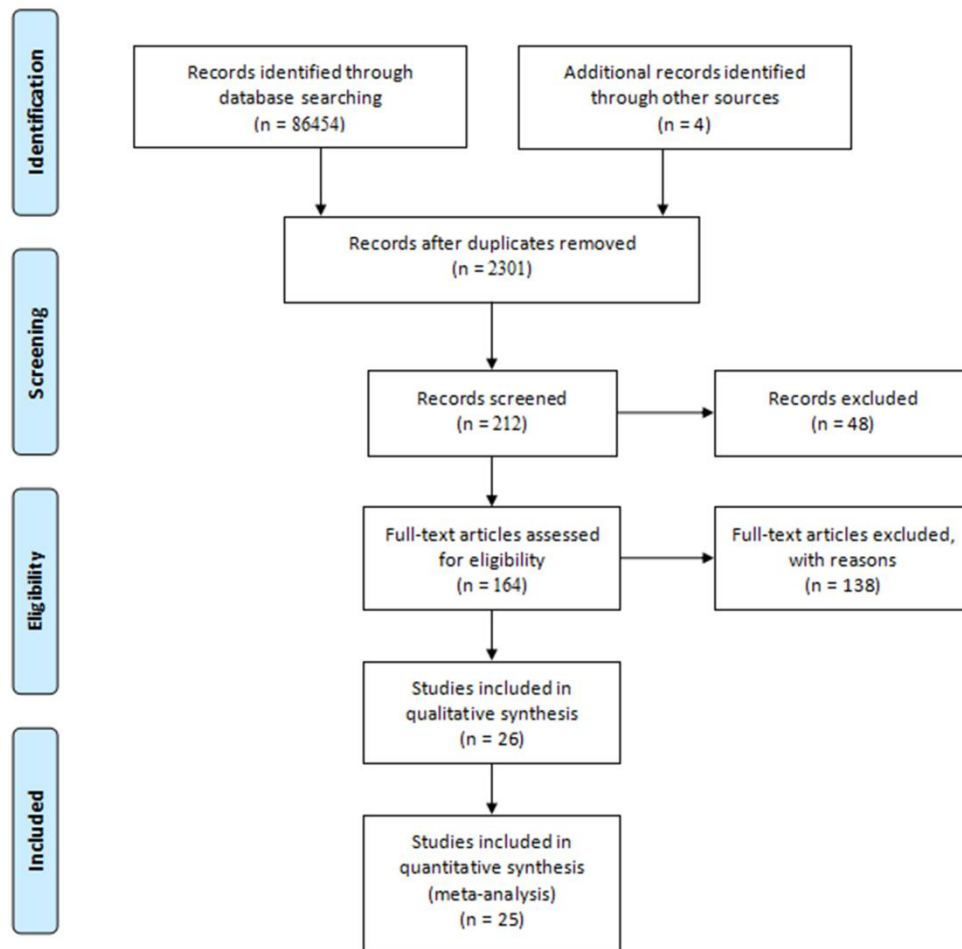

**Figure S1.** PRISMA Flow Diagram.
