# Supplementary material for: Mesenchymal Stem Cells: A New Choice for Nonsurgical Treatment of OA? Results from a Bayesian Network Meta-Analysis
Source: PubMed Central journal article supplement (PMC7876826; doi:10.1155/2021/6663003), 2021-02-02
Supplement: 6663003.f2.pdf [file 6663003.f2.pdf]

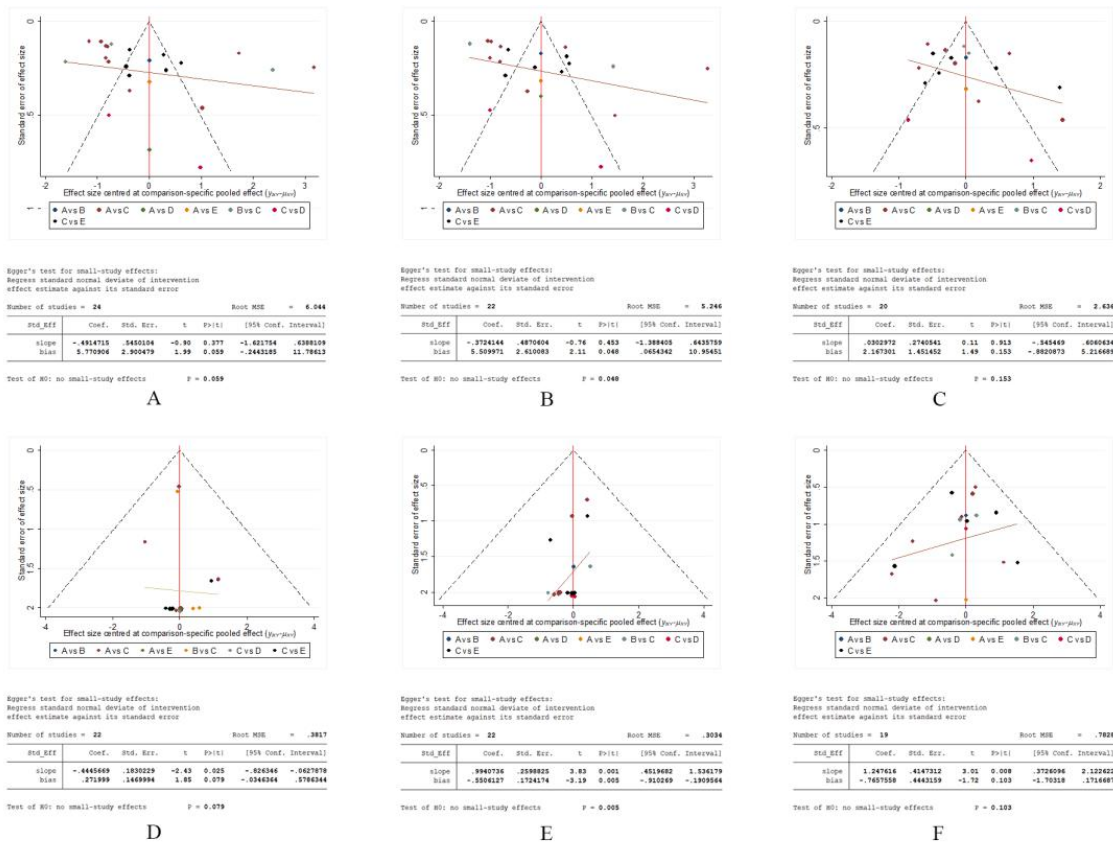

**Figure S2.** Publication bias and Egger test plots. (A) Pain relief. (B) Function improvement (C) Stiffness improvement. (D) Withdrawal due to AEs. (E) Serious AEs or death. (F) Injection site discomfort.
