# Supplementary material for: Mesenchymal Stem Cells: A New Choice for Nonsurgical Treatment of OA? Results from a Bayesian Network Meta-Analysis
Source: PubMed Central journal article supplement (PMC7876826; doi:10.1155/2021/6663003), 2021-02-02
Supplement: 6663003.f5.pdf [file 6663003.f5.pdf]

**Table S2.** Methodological quality and risk of bias evaluation.

| Article                                    | 1.Sequence generation | 2.Allocation concealment | 3.Blinding       | 4.Incomplete outcome data | 5.Selective outcome reporting | 6.Other source of bias |
|--------------------------------------------|-----------------------|--------------------------|------------------|---------------------------|-------------------------------|------------------------|
| Petrella RJ et al.[17]                     | High risk of bias     | Low risk of bias         | Low risk of bias | High risk of bias         | Low risk of bias              | Unclear risk of bias   |
| Sánchez M et al.[18]                       | Low risk of bias      | Low risk of bias         | Low risk of bias | Low risk of bias          | Low risk of bias              | Unclear risk of bias   |
| Arden NK et al.[19]                        | High risk of bias     | High risk of bias        | Low risk of bias | Low risk of bias          | Low risk of bias              | Unclear risk of bias   |
| Neustadt D et al.[20]                      | Low risk of bias      | Low risk of bias         | Low risk of bias | Low risk of bias          | Low risk of bias              | Unclear risk of bias   |
| Trueba Davalillo C <sup>Á</sup> et al.[21] | Unclear risk of bias  | Low risk of bias         | Low risk of bias | Low risk of bias          | Low risk of bias              | Unclear risk of bias   |
| Monfort J et al.[22]                       | Low risk of bias      | Low risk of bias         | Low risk of bias | High risk of bias         | Low risk of bias              | Unclear risk of bias   |
| Vaquerizo V et al.[23]                     | Low risk of bias      | Low risk of bias         | Low risk of bias | High risk of bias         | Low risk of bias              | Unclear risk of bias   |
| Buendía-López D et al.[24]                 | Low risk of bias      | Unclear risk of bias     | Low risk of bias | Low risk of bias          | Low risk of bias              | Unclear risk of bias   |

|                          |                      |                   |                  |                  |                  |                      |
|--------------------------|----------------------|-------------------|------------------|------------------|------------------|----------------------|
| Richette P et al.[25]    | Low risk of bias     | Low risk of bias  | Low risk of bias | Low risk of bias | Low risk of bias | Unclear risk of bias |
| McAlindon TE et al.[26]  | Low risk of bias     | Low risk of bias  | Low risk of bias | Low risk of bias | Low risk of bias | Unclear risk of bias |
| Wu YT et al.[27]         | High risk of bias    | High risk of bias | Low risk of bias | Low risk of bias | Low risk of bias | Unclear risk of bias |
| Altman RD et al.[28]     | Low risk of bias     | Low risk of bias  | Low risk of bias | Low risk of bias | Low risk of bias | Unclear risk of bias |
| Raeissadat SA et al.[29] | Low risk of bias     | Low risk of bias  | Low risk of bias | Low risk of bias | Low risk of bias | Unclear risk of bias |
| Brander V et al.[30]     | Unclear risk of bias | High risk of bias | Low risk of bias | Low risk of bias | Low risk of bias | Unclear risk of bias |
| Louis ML et al.[31]      | Low risk of bias     | Low risk of bias  | Low risk of bias | Low risk of bias | Low risk of bias | Unclear risk of bias |
| Spitzer AI et al.[32]    | Low risk of bias     | Low risk of bias  | Low risk of bias | Low risk of bias | Low risk of bias | Unclear risk of bias |
| Emadedin M et al.[33]    | Low risk of bias     | Low risk of bias  | Low risk of bias | Low risk of bias | Low risk of bias | Unclear risk of bias |

|                                      |                   |                   |                  |                  |                  |                      |
|--------------------------------------|-------------------|-------------------|------------------|------------------|------------------|----------------------|
| Zheping H et al.[34]                 | Low risk of bias  | High risk of bias | Low risk of bias | Low risk of bias | Low risk of bias | Unclear risk of bias |
| Bastos R et al.[35]                  | Low risk of bias  | Low risk of bias  | Low risk of bias | Low risk of bias | Low risk of bias | Unclear risk of bias |
| Teng-Le Hu et al.[36]                | High risk of bias | High risk of bias | Low risk of bias | Low risk of bias | Low risk of bias | Unclear risk of bias |
| Seyed Ahmad<br>Raeissadat et al.[37] | Low risk of bias  | High risk of bias | Low risk of bias | Low risk of bias | Low risk of bias | Unclear risk of bias |
| Matas J et al.[38]                   | Low risk of bias  | Low risk of bias  | Low risk of bias | Low risk of bias | Low risk of bias | Unclear risk of bias |
| Cohen MM et al.[39]                  | High risk of bias | Low risk of bias  | Low risk of bias | Low risk of bias | Low risk of bias | Unclear risk of bias |
| Chevalier X et al.[40]               | Low risk of bias  | Low risk of bias  | Low risk of bias | Low risk of bias | Low risk of bias | Unclear risk of bias |
| DeCaria JE et al.[41]                | Low risk of bias  | Low risk of bias  | Low risk of bias | Low risk of bias | Low risk of bias | Unclear risk of bias |

---
