# Supplementary material for: Mesenchymal Stem Cells: A New Choice for Nonsurgical Treatment of OA? Results from a Bayesian Network Meta-Analysis
Source: PubMed Central journal article supplement (PMC7876826; doi:10.1155/2021/6663003), 2021-02-02
Supplement: 6663003.f6.pdf [file 6663003.f6.pdf]

**Table S3.** The details of direct meta-analysis.

| Comparison      | Target joint     | SMD(95%CI)<br>for Pain relief | SMD(95%CI)<br>for Function improvement | SMD(95%CI)<br>for Stiffness improvement | OR(95%CI)<br>for Withdrawal due to AEs | OR(95%CI)<br>for Serious AEs or death | OR(95%CI)<br>for Injection site discomfort |
|-----------------|------------------|-------------------------------|----------------------------------------|-----------------------------------------|----------------------------------------|---------------------------------------|--------------------------------------------|
| GCs vs placebo  | Knee             | -2.055(-2.466,-1.645)         | -0.622(-0.962,-0.283)                  | 0.240(-0.093,0.572)                     | Insufficient comparison                | Insufficient comparison               | Insufficient comparison                    |
| HA vs placebo   | Knee, hip, ankle | 0.942(0.084,1.801)            | 0.865(0.138,1.592)                     | 0.388(-0.062,0.838)                     | 1.023(0.479,2.182)                     | 0.498(0.168,1.477)                    | 0.500(0.282,0.885)                         |
| MSCs vs placebo | Knee             | 5.534 (4.193,6.874)           | 2.314(1.531,3.097)                     | 0.702(0.081,1.323)                      | Insufficient comparison                | Insufficient comparison               | Insufficient comparison                    |
| PRP vs placebo  | Knee             | 0.571(-0.062,1.204)           | 0.347(-0.278,0.972)                    | 0.345(-0.280,0.969)                     | Insufficient comparison                | Insufficient comparison               | Insufficient comparison                    |
