# Supplementary material for: Mesenchymal Stem Cells: A New Choice for Nonsurgical Treatment of OA? Results from a Bayesian Network Meta-Analysis
Source: PubMed Central journal article supplement (PMC7876826; doi:10.1155/2021/6663003), 2021-02-02
Supplement: 6663003.f7.pdf [file 6663003.f7.pdf]

**Table S4.** The detailed results of network meta-analysis for pain (Red) and function (Blue) (Data are standardised mean difference, from the top left to the bottom right, higher comparator vs lower comparator, and their related 95% CI)

|                     |                       |                       |                        |                        |
|---------------------|-----------------------|-----------------------|------------------------|------------------------|
| <b>MSCs</b>         | -0.94 (-2.72 to 0.83) | -1.52 (-3.05 to 0.02) | -4.18 (-6.45 to -1.91) | -2.45 (-4.05 to -0.85) |
| 2.30 (0.36 to 4.24) | <b>PRP</b>            | -0.57 (-1.49 to 0.35) | -3.24 (-5.19 to -1.28) | -1.51 (-2.68 to -0.33) |
| 2.78 (1.10 to 4.46) | 0.48 (-0.51 to 1.48)  | <b>HA</b>             | -2.66 (-4.42 to -0.91) | -0.93 (-1.79 to -0.08) |
| 4.86 (2.75 to 6.97) | 2.57 (0.93 to 4.20)   | 2.08 (0.77 to 3.40)   | <b>GCs</b>             | 1.73 (-0.02 to 3.48)   |
| 3.61 (1.87 to 5.35) | 1.31 (0.13 to 2.50)   | 0.83 (0.08 to 1.58)   | -1.25 (-2.67 to 0.17)  | <b>Placebo</b>         |
