# Supplementary material for: Mesenchymal Stem Cells: A New Choice for Nonsurgical Treatment of OA? Results from a Bayesian Network Meta-Analysis
Source: PubMed Central journal article supplement (PMC7876826; doi:10.1155/2021/6663003), 2021-02-02
Supplement: 6663003.f8.pdf [file 6663003.f8.pdf]

**Table S5.** The detailed results of network meta-analysis for stiffness (Data are standardised mean difference, from the top left to the bottom right, higher comparator vs lower comparator, and their related 95% CI)

|                      |                     |                      |                       |                |
|----------------------|---------------------|----------------------|-----------------------|----------------|
| <b>MSCs</b>          |                     |                      |                       |                |
| 0.13 (-0.88 to 1.14) | <b>PRP</b>          |                      |                       |                |
| 0.68 (-0.21 to 1.57) | 0.55 (0.05 to 1.04) | <b>HA</b>            |                       |                |
| 1.24 (0.10 to 2.37)  | 1.10 (0.23 to 1.97) | 0.55 (-0.17 to 1.28) | <b>GCs</b>            |                |
| 1.02 (0.11 to 1.94)  | 0.89 (0.27 to 1.51) | 0.34 (-0.09 to 0.77) | -0.21 (-0.98 to 0.56) | <b>Placebo</b> |
