# Supplementary material for: Mesenchymal Stem Cells: A New Choice for Nonsurgical Treatment of OA? Results from a Bayesian Network Meta-Analysis
Source: PubMed Central journal article supplement (PMC7876826; doi:10.1155/2021/6663003), 2021-02-02
Supplement: 6663003.f10.pdf [file 6663003.f10.pdf]

**Table S7.** The details of results for subgroup analysis of long-term follow-up.

| Treatment | SMD (95% CI)<br>for Pain relief | SURCA<br>for Pain<br>relief, % | SMD (95% CI)<br>for Function<br>improvement | SURCA<br>for Function<br>improvement, % | SMD (95% CI)<br>for Stiffness<br>improvement | SURCA<br>for Stiffness<br>improvement, % | OR (95% CI)<br>for withdrawal due<br>to AEs | SURCA<br>for Withdrawal<br>due to AEs, % | OR (95% CI)<br>for Serious AEs<br>or death | SURCA<br>for Serious AEs<br>or death, % | OR (95% CI)<br>for Injection site<br>discomfort | SURCA<br>for Injection site<br>discomfort, % |
|-----------|---------------------------------|--------------------------------|---------------------------------------------|-----------------------------------------|----------------------------------------------|------------------------------------------|---------------------------------------------|------------------------------------------|--------------------------------------------|-----------------------------------------|-------------------------------------------------|----------------------------------------------|
| Placebo   | Reference                       | 23.1                           | Reference                                   | 22.9                                    | Reference                                    | 15.2                                     | Reference                                   | 50.9                                     | Reference                                  | 62.1                                    | Reference                                       | 81.5                                         |
| MSCs      | 3.80 (1.96,5.63)                | 99.6                           | 2.57 (0.93,4.21)                            | 94.8                                    | 1.15 (0.17,2.13)                             | 85.7                                     | -0.27 (-4.36,3.81)                          | 56.4                                     | 0.35 (-2.04,2.73)                          | 42.7                                    | 0.07 (-1.88,2.01)                               | 67.1                                         |
| PRP       | 1.55 (0.25,2.85)                | 70.0                           | 1.66 (0.46,2.86)                            | 76.0                                    | 1.06 (0.34,1.78)                             | 85.0                                     | 0.03 (-1.55,1.61)                           | 49.7                                     | 0.39 (-1.00,1.78)                          | 39.2                                    | 1.07 (-0.02,2.16)                               | 13.1                                         |
| HA        | 1.11 (0.20,2.01)                | 54.9                           | 1.12 (0.24,1.99)                            | 53.9                                    | 0.53 (-0.04,1.11)                            | 51.0                                     | -0.17 (-0.91,0.56)                          | 65.8                                     | 0.46 (-0.44,1.35)                          | 31.2                                    | 0.72 (-0.09,1.52)                               | 34.7                                         |
| GCS       | -1.05 (-2.57,0.48)              | 2.4                            | -1.04 (-2.57,0.49)                          | 2.4                                     | -0.08 (-0.94,0.78)                           | 13.1                                     | 0.38 (-0.78,1.54)                           | 27.2                                     | -0.51 (-2.55,1.54)                         | 74.9                                    | 0.43 (-0.68,1.54)                               | 53.6                                         |
