# Supplementary material for: Mesenchymal Stem Cells: A New Choice for Nonsurgical Treatment of OA? Results from a Bayesian Network Meta-Analysis
Source: PubMed Central journal article supplement (PMC7876826; doi:10.1155/2021/6663003), 2021-02-02
Supplement: 6663003.f11.pdf [file 6663003.f11.pdf]

**Table 8.** The details of results for subgroup analysis of knee OA.

| Treatment | SMD (95% CI)<br>for Pain relief | SURCA<br>for Pain<br>relief, % | SMD (95% CI)<br>for Function<br>improvement | SURCA<br>for Function<br>improvement, % | SMD (95% CI)<br>for Stiffness<br>improvement | SURCA<br>for Stiffness<br>improvement, % | OR (95% CI)<br>for withdrawal due<br>to AEs | SURCA<br>for Withdrawal<br>due to AEs, % | OR (95% CI)<br>for Serious AEs<br>or death | SURCA<br>for Serious AEs<br>or death, % | OR (95% CI)<br>for Injection site<br>discomfort | SURCA<br>for Injection site<br>discomfort, % |
|-----------|---------------------------------|--------------------------------|---------------------------------------------|-----------------------------------------|----------------------------------------------|------------------------------------------|---------------------------------------------|------------------------------------------|--------------------------------------------|-----------------------------------------|-------------------------------------------------|----------------------------------------------|
| Placebo   | Reference                       | 25.2                           | Reference                                   | 25.0                                    | Reference                                    | 20.0                                     | Reference                                   | 50.9                                     | Reference                                  | 60.4                                    | Reference                                       | 83.9                                         |
| MSCs      | 3.79 (2.12,5.45)                | 99.8                           | 2.45 (0.85,4.05)                            | 85.5                                    | 0.97 (0.09,1.86)                             | 88.1                                     | -0.10 (-4.28,4.09)                          | 53.3                                     | 0.35 (-2.03,2.74)                          | 41.7                                    | 0.26 (-1.68,2.20)                               | 63.7                                         |
| PRP       | 1.55 (0.39,2.71)                | 70.6                           | 1.51 (0.33,2.68)                            | 75.6                                    | 0.83 (0.21,1.44)                             | 83.4                                     | 0.18 (-1.59,1.94)                           | 43.2                                     | 0.40 (-0.98,1.79)                          | 36.6                                    | 1.31 (0.24,2.37)                                | 12.2                                         |
| HA        | 1.11 (0.29,1.92)                | 54.4                           | 0.93 (0.08,1.79)                            | 53.0                                    | 0.27 (-0.19,0.74)                            | 44.4                                     | 0.00 (-1.17,1.17)                           | 51.9                                     | 0.47 (-0.41,1.34)                          | 29.8                                    | 0.96 (0.19,1.73)                                | 31.9                                         |
| GCs       | -2.56<br>(-4.33,-0.80)          | 0.1                            | -1.73 (-3.48,0.02)                          | 0.7                                     | -0.15 (-1.02,0.71)                           | 14.2                                     | -0.00 (-2.85,2.84)                          | 50.7                                     | -0.88 (-3.20,1.43)                         | 81.5                                    | 0.48 (-0.80,1.76)                               | 58.2                                         |
